# Supplementary material for: HIF-2α promotes the formation of vasculogenic mimicry in pancreatic cancer by regulating the binding of Twist1 to the VE-cadherin promoter
Source: PubMed Central journal article supplement (PMC5564606; doi:10.18632/oncotarget.17999), 2017-05-18
Supplement: oncotarget-08-47801-s001.pdf [file oncotarget-08-47801-s001.pdf]

# HIF-2 $\alpha$ promotes the formation of vasculogenic mimicry in pancreatic cancer by regulating the binding of Twist1 to the VE-cadherin promoter

## SUPPLEMENTARY MATERIALS

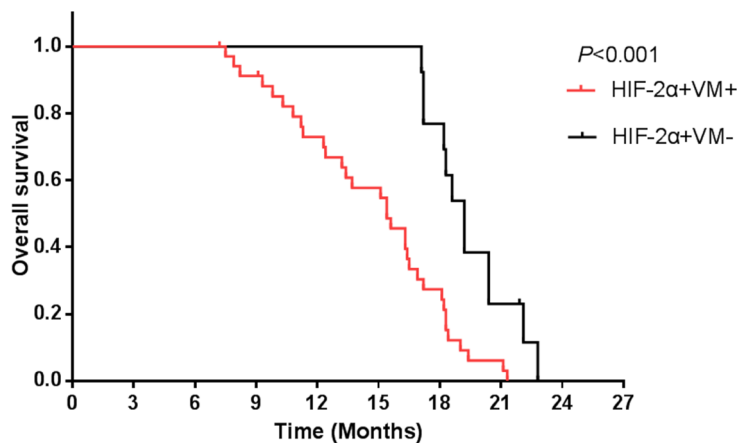

Supplementary Figure 1: Survival curves of HIF-2 $\alpha$ +VM+ group and HIF-2 $\alpha$ +VM- group in pancreatic cancer patients (log-rank test,  $P < 0.05$ ).
